# Supplementary material for: Stories told by corals, algae, and sea-urchins in a Mesoamerican coral reef: degradation trumps succession
Source: PeerJ. 2023 Jan 16;11:e14680. doi: 10.7717/peerj.14680 (PMC9851048; doi:10.7717/peerj.14680)
Supplement: Supplemental Information 10 [file peerj-11-14680-s010.xlsx]

## Sheet: Hoja1
semester	condition	square	seaUrchins	Adults_FB_Corals_Prop	juv_FB_CoralsProp	Adults_FB_CoralsProp	juv_NFB_CoralsProp	nonCCAProp	CCA_Prop	otherGroupsProp	totalProp
Feb_13	impacted	1	0	0	0	0.22532	0	0.29517	0.29065	0.18886	1
Feb_13	impacted	2	0	0	0	0.12943	0	0.26834	0.1173	0.48493	1
Feb_13	impacted	4	0	0	0	0.16415	0.00031	0.61386	0.10231	0.11936	1
Feb_13	impacted	5	0	0.00613	0	0.03652	0	0.68288	0.08929	0.18519	1
Feb_13	impacted	6	0	0	0	0.00781	0	0.2849	0.04961	0.65768	1
Feb_13	impacted	7	0	0	0	0.06966	0	0.50322	0.15221	0.27491	1
Feb_13	impacted	8	0	0	0	0.04626	0	0.63021	0.08088	0.24265	1
Feb_13	impacted	9	0	0	0	0.04524	0	0.55526	0.18509	0.21441	1
Feb_13	impacted	10	0	0	0	0.08459	0	0.73412	0.05148	0.12981	1
Feb_13	impacted	11	0	0	0	0.01178	0	0.78044	0.07245	0.13533	1
Feb_13	impacted	15	0	0.00565	0	0.10512	0	0.60524	0.14519	0.1388	1
Feb_13	impacted	16	0	0.00283	0	0.14303	0	0.36666	0.2916	0.19588	1
Feb_13	impacted	21	0	0	0	0.01284	0	0.48379	0.11288	0.39049	1
Feb_13	impacted	22	0	0	0	0.213	0	0.27202	0.13733	0.37766	1
Feb_13	impacted	23	0	0	0	0.12026	0.00031	0.39736	0.15296	0.3291	1
Feb_13	impacted	25	0	0	0	0.0249	0	0.4531	0.14644	0.37557	1
Feb_13	impacted	26	0	0.00318	0	0.00459	0	0.72332	0.11233	0.15658	1
Feb_13	impacted	27	0	0.01217	0	0.01636	0	0.40546	0.27733	0.28868	1
Feb_13	impacted	35	0	0.32235	0	0.30742	0	0.2473	0.02732	0.09561	1
Feb_13	impacted	36	0	0.26544	0	0.32928	0	0.30411	0.04	0.06117	1
Feb_13	impacted	38	0	0.00196	0	0.17174	0	0.60109	0.13546	0.08974	1
Feb_13	impacted	40	1	0.00661	0	0.20733	0	0.56937	0.13748	0.0792	1
Feb_13	nonImpacted	43	0	0	0	0.28987	0	0.50276	0.1835	0.02387	1
Feb_13	nonImpacted	44	0	0.35029	0	0.12723	0	0.34531	0.11962	0.05755	1
Feb_13	nonImpacted	45	0	0.17785	0	0.0992	0.00181	0.41452	0.18597	0.12066	1
Feb_13	nonImpacted	46	0	0.05596	0	0.14302	0	0.71185	0.02972	0.05944	1
Feb_13	nonImpacted	47	0	0.37935	0	0.23876	0	0.27091	0.0131	0.09789	1
Feb_13	nonImpacted	48	0	0	0	0.09311	0	0.47612	0.12243	0.30834	1
Feb_13	nonImpacted	49	3	0.06249	0	0.14259	0	0.59619	0.09937	0.09937	1
Feb_13	nonImpacted	59	1	0	0	0.08341	0	0.61648	0.02994	0.27016	1
Feb_13	nonImpacted	63	2	0.04411	0	0.05016	0	0.6946	0.08262	0.12852	1
Feb_13	nonImpacted	64	1	0	0	0.11325	0	0.56604	0.24386	0.07685	1
Feb_13	nonImpacted	65	2	0.16965	0	0.42814	0	0.27514	0.02625	0.10082	1
Feb_13	nonImpacted	67	0	0	0	0.0763	0	0.2142	0.28794	0.42156	1
Feb_13	nonImpacted	68	0	0.0224	0	0.29307	0	0.30662	0.24264	0.13527	1
Feb_13	nonImpacted	74	0	0.25251	0	0.09689	0	0.60587	0.01917	0.02556	1
Feb_13	nonImpacted	77	0	0.1274	0	0	0	0.72619	0.10542	0.04099	1
Feb_13	nonImpacted	78	0	0.0055	0	0.09708	0	0.71345	0.0359	0.14808	1
Feb_13	nonImpacted	79	0	0	0	0.09001	0	0.669	0.08483	0.15616	1
Aug_13	impacted	1	0	0	0	0.22777	0.00503	0.2854	0.35292	0.12889	1
Aug_13	impacted	6	0	0	0	0.00789	0	0.39764	0.02982	0.56465	1
Aug_13	impacted	8	0	0	0	0.04571	0	0.50577	0.2233	0.22521	1
Aug_13	impacted	9	0	0	0	0.08364	0.00283	0.56957	0.14979	0.19417	1
Aug_13	impacted	10	0	0	0	0.06888	0	0.7602	0.0188	0.15213	1
Aug_13	impacted	11	1	0	0	0	0.00063	0.82513	0.15822	0.01602	1
Aug_13	impacted	15	1	0	0	0.09684	0	0.70788	0.12205	0.07323	1
Aug_13	impacted	17	0	0	0	0.39568	0.00126	0.29197	0.17901	0.13208	1
Aug_13	impacted	19	1	0.12606	0	0.09205	0.00377	0.50339	0.10989	0.16484	1
Aug_13	impacted	20	0	0.00463	0	0.13988	0.00157	0.4814	0.07259	0.29992	1
Aug_13	impacted	21	0	0.00267	0	0.00887	0	0.6193	0.13314	0.23602	1
Aug_13	impacted	22	0	0	0	0.15512	0	0.44931	0.18074	0.21483	1
Aug_13	impacted	27	0	0	0	0.01162	0	0.64244	0.33802	0.00791	1
Aug_13	impacted	32	0	0.07226	0	0.1644	0.00031	0.57609	0.13353	0.05341	1
Aug_13	impacted	35	1	0.21379	0	0.32233	0	0.26476	0.09051	0.10862	1
Aug_13	impacted	38	0	0.03754	0	0.19823	0	0.50392	0.19856	0.06174	1
Aug_13	impacted	40	2	0.01225	0	0.35948	0	0.54744	0.06062	0.02021	1
Aug_13	nonImpacted	41	0	0	0	0.4024	0.0008	0.38951	0.12528	0.082	1
Aug_13	nonImpacted	45	0	0.01139	0	0.27537	0.0008	0.35201	0.17348	0.18695	1
Aug_13	nonImpacted	47	0	0.02937	0	0.13377	0	0.60188	0.00181	0.23316	1
Aug_13	nonImpacted	53	2	0.00247	0	0.36923	0.00534	0.22292	0.32827	0.07176	1
Aug_13	nonImpacted	56	0	0	0	0.13755	0	0.67001	0.02784	0.1646	1
Aug_13	nonImpacted	57	0	0.05898	0	0.12959	0	0.47545	0.21351	0.12246	1
Aug_13	nonImpacted	64	1	0.00063	0.00045	0.08386	0	0.48073	0.38792	0.0464	1
Aug_13	nonImpacted	65	1	0.03526	0	0.23774	0	0.47413	0.19755	0.05531	1
Aug_13	nonImpacted	67	0	0	0	0.06409	0	0.73097	0.16396	0.04099	1
Aug_13	nonImpacted	69	0	0.04705	0	0.12087	0	0.57886	0.18945	0.06378	1
Aug_13	nonImpacted	70	0	0.27929	0	0.15854	0	0.29523	0.11071	0.15623	1
Aug_13	nonImpacted	71	2	0.04265	0	0.60295	0.00102	0.28687	0.04167	0.02484	1
Aug_13	nonImpacted	76	0	0.07037	0	0.39977	0	0.29282	0.09063	0.14641	1
Aug_13	nonImpacted	77	0	0.17326	0	0.0139	0	0.56899	0.15119	0.09266	1
Aug_13	nonImpacted	78	0	0.00079	0	0.01182	0.00342	0.82654	0.08659	0.07085	1
Feb_14	impacted	1	2	0	0	0.13991	0	0.38038	0.4311	0.0486	1
Feb_14	impacted	4	0	0	0	0.08815	0.00453	0.72402	0.03666	0.14664	1
Feb_14	impacted	7	1	0	0	0.08812	0.00363	0.71895	0.03442	0.15488	1
Feb_14	impacted	9	0	0	0	0.09912	0	0.69031	0.13916	0.07141	1
Feb_14	impacted	10	0	0	0	0.04232	0	0.60761	0.04638	0.30368	1
Feb_14	impacted	11	0	0	0	0.00679	0.00363	0.89062	0.08708	0.01187	1
Feb_14	impacted	16	0	0	0	0.08742	0.00404	0.38467	0.37184	0.15203	1
Feb_14	impacted	17	0	0	0	0.16812	0	0.52416	0.22688	0.08084	1
Feb_14	impacted	19	0	0.06762	0	0.11182	0.00038	0.34333	0.11989	0.35695	1
Feb_14	impacted	21	0	0	0	0	0.00608	0.88799	0.05409	0.05184	1
Feb_14	impacted	22	0	0	0	0.13582	0.00385	0.83036	0	0.02997	1
Feb_14	impacted	23	0	0	0	0.10142	0	0.78877	0.097	0.01281	1
Feb_14	impacted	25	0	0.00188	0.00229	0.01374	0.00126	0.72763	0.04714	0.20606	1
Feb_14	impacted	26	0	0.00471	0	0.0074	0	0.87192	0.05798	0.05798	1
Feb_14	impacted	32	2	0.09156	0.00196	0.09246	0	0.69191	0.09854	0.02356	1
Feb_14	impacted	40	5	0.03077	0	0.26517	0.00518	0.55328	0.0563	0.0893	1
Feb_14	nonImpacted	41	1	0	0	0.30775	0	0.36715	0.17791	0.14718	1
Feb_14	nonImpacted	46	1	0.04453	0	0.03149	0	0.81567	0.06723	0.04107	1
Feb_14	nonImpacted	47	0	0.00864	0	0.12324	0	0.73259	0.03297	0.10256	1
Feb_14	nonImpacted	49	5	0.06362	0	0.09258	0.00363	0.71482	0.08131	0.04404	1
Feb_14	nonImpacted	52	2	0	0	0.40066	0.00071	0.50836	0.0871	0.00317	1
Feb_14	nonImpacted	53	2	0.07516	0	0.88609	0	0.01964	0.01729	0.00181	1
Feb_14	nonImpacted	56	0	0	0	0.20361	0	0.41573	0.14203	0.23863	1
Feb_14	nonImpacted	57	0	0.02142	0	0.05202	0	0.78495	0.01163	0.12998	1
Feb_14	nonImpacted	63	2	0.01103	0	0.04667	0.00212	0.68534	0.15444	0.10039	1
Feb_14	nonImpacted	64	0	0	0.00045	0.0574	0	0.46619	0.26528	0.21067	1
Feb_14	nonImpacted	68	0	0.06433	0	0.18433	0	0.54527	0.19148	0.01459	1
Feb_14	nonImpacted	69	0	0.03954	0	0.10403	0.00302	0.6386	0.11913	0.09569	1
Feb_14	nonImpacted	70	0	0.02267	0	0.12806	0.02345	0.61829	0.10161	0.10593	1
Feb_14	nonImpacted	74	0	0.20066	0	0.06726	0	0.63522	0.08196	0.0149	1
Feb_14	nonImpacted	76	0	0.0305	0	0.15399	0	0.47626	0.14598	0.19327	1
Feb_14	nonImpacted	77	0	0.14396	0	0.01995	0	0.43944	0.19421	0.20243	1
Sep_14	impacted	1	0	0	0	0.13113	0	0.5444	0.30269	0.02178	1
Sep_14	impacted	2	0	0	0	0.14473	0.00335	0.47458	0.02498	0.35236	1
Sep_14	impacted	4	0	0	0	0.15353	0.00205	0.42907	0.04506	0.37029	1
Sep_14	impacted	5	0	0.00256	0	0.05799	0.00212	0.71973	0.01883	0.19876	1
Sep_14	impacted	7	1	0	0	0.07674	0	0.5841	0.16539	0.17376	1
Sep_14	impacted	11	0	0	0	0.00825	0	0.72435	0.10975	0.15764	1
Sep_14	impacted	17	0	0	0	0.14258	0	0.64919	0.06824	0.13999	1
Sep_14	impacted	19	0	0.09331	0.0043	0.21889	0	0.5898	0.03225	0.06144	1
Sep_14	impacted	20	0	0.0033	0	0.11888	0	0.41813	0.00519	0.45449	1
Sep_14	impacted	21	0	0	0	0.00339	0	0.79318	0.00822	0.19521	1
Sep_14	impacted	22	0	0.0017	0	0.12481	0	0.45946	0.01398	0.40006	1
Sep_14	impacted	26	0	0.01024	0	0.00743	0	0.90178	0.00786	0.07269	1
Sep_14	impacted	27	0	0.00462	0	0.01637	0	0.31328	0.04699	0.61874	1
Sep_14	impacted	32	0	0.17834	0	0.16293	0	0.62842	0.01595	0.01435	1
Sep_14	impacted	36	0	0.20648	0	0.16331	0	0.59739	0.00788	0.02495	1
Sep_14	impacted	40	1	0.05239	0	0.19212	0	0.64622	0.05464	0.05464	1
Sep_14	nonImpacted	43	0	0	0	0.08403	0	0.75527	0.12626	0.03443	1
Sep_14	nonImpacted	44	1	0.26881	0	0.03547	0	0.62399	0.04447	0.02725	1
Sep_14	nonImpacted	46	0	0.03793	0	0.04518	0	0.75212	0.11594	0.04883	1
Sep_14	nonImpacted	48	0	0.0077	0	0.06158	0.00113	0.71682	0.09089	0.12188	1
Sep_14	nonImpacted	49	0	0.0754	0	0.1881	0.00363	0.70811	0	0.02476	1
Sep_14	nonImpacted	52	2	0	0	0.15574	0.00592	0.79578	0.00426	0.0383	1
Sep_14	nonImpacted	53	3	0	0	0.3294	0.00503	0.316	0.18772	0.16185	1
Sep_14	nonImpacted	57	0	0	0	0.06358	0.00302	0.70918	0.03434	0.18987	1
Sep_14	nonImpacted	59	0	0	0	0.11895	0	0.81361	0.02682	0.04062	1
Sep_14	nonImpacted	63	1	0	0	0.14671	0	0.73589	0.07709	0.0403	1
Sep_14	nonImpacted	64	1	0.0044	0	0.11358	0	0.61565	0.16229	0.10408	1
Sep_14	nonImpacted	65	0	0.11624	0	0.36012	0.00152	0.4127	0.08087	0.02854	1
Sep_14	nonImpacted	68	0	0.14561	0	0.26132	0	0.51591	0.06808	0.00908	1
Sep_14	nonImpacted	71	0	0.01257	0	0.15448	0	0.66218	0.12547	0.04531	1
Sep_14	nonImpacted	74	0	0.20255	0	0.07618	0	0.66873	0.01818	0.03435	1
Sep_14	nonImpacted	77	0	0.21818	0	0.03142	0	0.69037	0.05103	0.009	1
Sep_14	nonImpacted	78	0	0	0	0.08632	0	0.81384	0.04521	0.05463	1
Sep_14	nonImpacted	79	0	0	0	0.13664	0.00068	0.58352	0.16029	0.11887	1
